# Supplementary material
Source: PubMed Central journal article supplement (PMC3090230)

## Supplemental Data Tables and Figures

**Supplemental Table 1.** Changes in liver ApoB mRNA knockdown and serum lipid levels in *Ldlr<sup>+/-</sup> CETP<sup>+/-</sup>* mice at day 3 following a single 3 mg/kg dose of OCD-ApoB:(10168). Reduction in serum lipid profiles (including HDL) correlates with ApoB mRNA knockdown.

|                                | <b>mRNA</b>             | <b>TC</b>           |                | <b>HDL</b>          |                     | <b>non-HDL</b>      |                |
|--------------------------------|-------------------------|---------------------|----------------|---------------------|---------------------|---------------------|----------------|
| <b>ApoB<br/>siRNA<br/>dose</b> | <b>%<br/>Expression</b> | <b>%<br/>change</b> | <b>p-value</b> | <b>%<br/>change</b> | <b>p-<br/>value</b> | <b>%<br/>change</b> | <b>p-value</b> |
| <b>3.0 mg/kg</b>               | 5.5                     | -68.8               | <0.0001        | -56.0               | 0.0002              | -81.7               | <0.0001        |
| <b>1.0 mg/kg</b>               | 7.4                     | -65.4               | <0.0001        | -52.4               | 0.0004              | -78.5               | <0.0001        |
| <b>0.3 mg/kg</b>               | 13.9                    | -57.0               | <0.0001        | -34.5               | 0.0069              | -79.7               | <0.0001        |
| <b>0.1 mg/kg</b>               | 42.9                    | -30.6               | 0.0002         | -17.7               | 0.0946              | -43.4               | 0.0002         |

**Supplemental Table 2.** Biological Pathways significantly enriched in liver upon ApoB KD.

| <b>Similar Set</b>               | <b>Expectation</b> | <b>Collection</b>     |
|----------------------------------|--------------------|-----------------------|
| sterol metabolic process         | 3.87 E-17          | GO Biological Process |
| sterol biosynthetic process      | 1.12 E-16          | GO Biological Process |
| alcohol metabolic process        | 1.94 E-14          | GO Biological Process |
| cholesterol metabolic process    | 2.87 E-14          | GO Biological Process |
| Lipid synthesis                  | 3.34 E-14          | SwissProt Keywords    |
| lipid metabolic process          | 1.54 E-12          | GO Biological Process |
| small molecule metabolic process | 1.14 E-11          | GO Biological Process |
| steroid metabolic process        | 2.87 E-11          | GO Biological Process |
| lipid biosynthetic process       | 1.18 E-09          | GO Biological Process |
| steroid biosynthetic process     | 2.71 E-09          | GO Biological Process |

**Supplemental Figure 1.** *In vivo* efficacy of LNP201-ApoB siRNAs at day 1 and 3 post dosing in BALB/c mice. Animals were dosed i.v. with a single 3 mg/kg dose of ApoB siRNA-LNPs non-targeting control siRNA-LNP or PBS (vehicle) control. ApoB liver mRNA knockdown is over 90% for all siRNAs tested at day 1 and 3 post dosing.

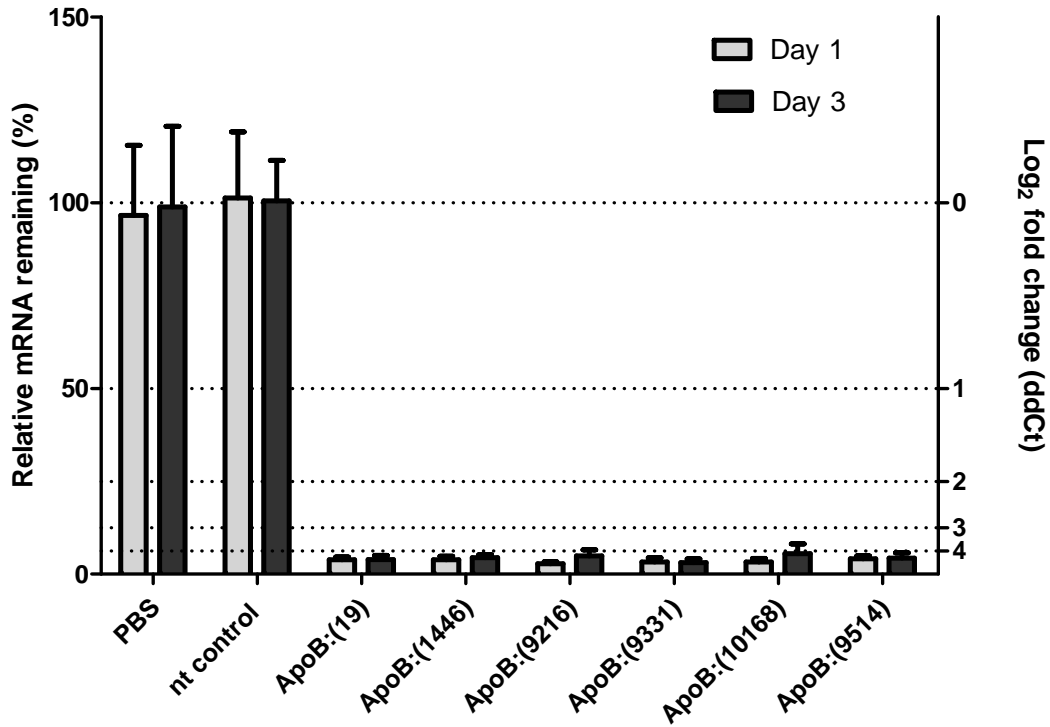

**Supplemental Figure 2.** Increasing concentrations of LNP201-ApoB siRNA exhibit greater reductions of serum LDL on day 1 and day 7 post-treatment in individual *Ldlr<sup>+/-</sup> CETP<sup>+/-</sup>* mice. Mice were dosed i.v. with a single 0.3, 1.0, or 3.0 mg/kg dose of LNP201-ApoB:(10168) and their serum lipids determined at day 1 and 7 post siRNA dosing. Reductions in serum LDL levels are dose-dependent and very uniform among different animals.

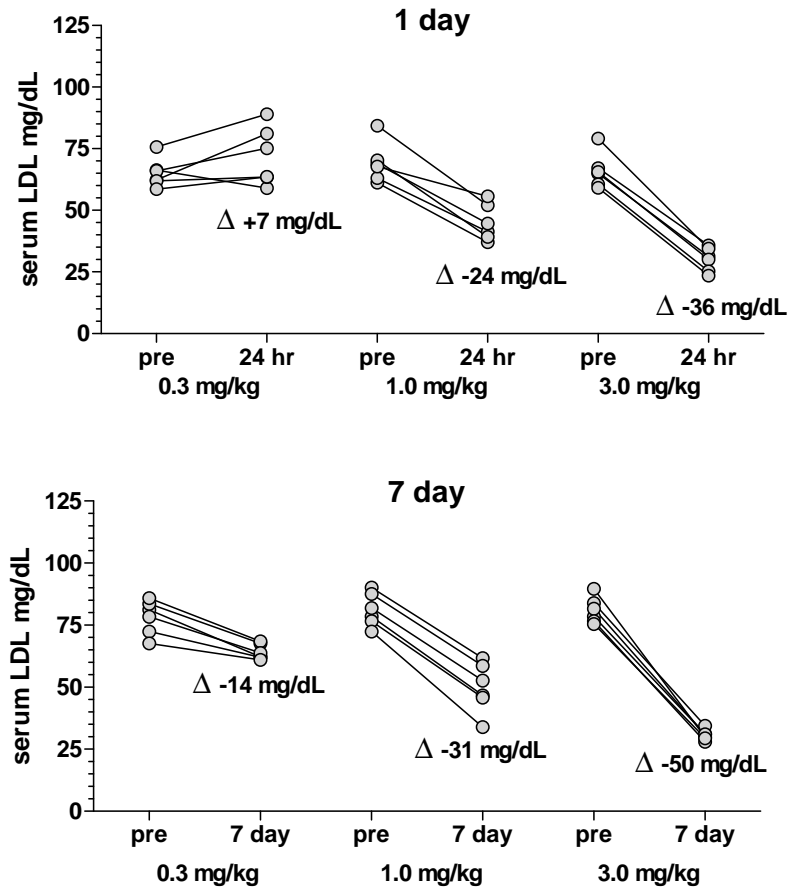

Supplement: supp_M012872_jlr.M012872-1.pdf [file supp_M012872_jlr.M012872-1.pdf]
